# Supplementary material for: Bacteriocins Revitalize Non-Effective Penicillin G to Overcome Methicillin-Resistant Staphylococcus pseudintermedius
Source: MDPI journal article supplement (doi:10.3390/antibiotics11121691), 2022-11-24
Supplement: s1 [file s1]

## Supplementary materials

**Supplemental Table 1.** Antibiotic resistance profile of MRSP isolates from dog skin infection. S – sensitive, R – resistant. The stars (\*) indicate resistant mutants appearing inside inhibition zone if incubated longer than 24h.

|    | Isolate<br>Antibiotic | LMGT | LMGT | LMGT | LMGT | LMGT | LMGT |
|----|-----------------------|------|------|------|------|------|------|
|    |                       | 4218 | 4219 | 4220 | 4221 | 4222 | 4223 |
| 1  | Ceftriaxone           | R    | R    | R    | S    | S    | R    |
| 2  | Chloramphenicol       | S    | S    | S    | S    | S    | S    |
| 3  | Ciprofloxacin         | S    | R    | R    | S    | S    | S    |
| 4  | Clindamycin           | S    | R    | S    | S    | S    | R    |
| 5  | Cloxacillin           | R    | R    | R    | R    | R    | R    |
| 6  | Erythromycin          | S    | R    | S    | S    | S    | R    |
| 7  | Fusidic acid          | S*   | S*   | R    | S*   | S*   | S*   |
| 8  | Gentamicin            | R    | R    | S    | S    | S    | R    |
| 9  | Kanamycin             | R    | R    | R    | R    | R    | R    |
| 10 | Ofloxacin             | S    | R    | R    | S    | S    | S    |
| 11 | Penicillin G          | R    | R    | R    | R    | R    | R    |
| 12 | Streptomycin          | R    | R    | R    | R    | R    | R    |
| 13 | Tetracycline          | R    | R    | S    | R    | R    | R    |
| 14 | Trimethoprim          | R    | R    | S    | R    | S    | R    |

See Materials and Methods section for detail of the assay and the conditions used.

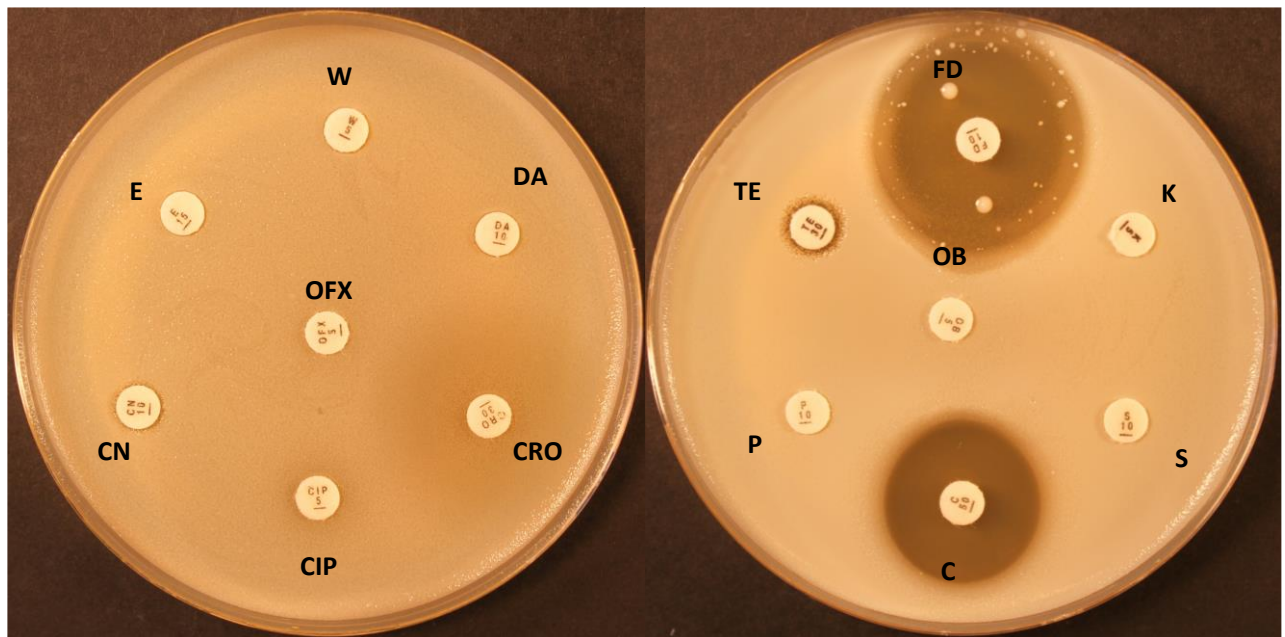

### Supplemental Figure 1

Antibiotic resistance profile of MRSP LMGT 4219

Antibiotic discs – FD-fusidic acid, 5 µg; K – kanamycin, 5 µg; S – streptomycin, 10µg; C – chloramphenicol, 50µg; P – penicillin G – 10µg; TE – tetracycline, 30µg; OB – cloxacillin, 5µg; W – trimethoprim, 5µg; DA – clindamycin, 10µg; CRO – ceftriaxone, 30µg; CIP – ciprofloxacin, 5µg; CN – gentamicin, 10µg; E – erythromycin, 15µg; OFX – ofloxacin, 5µg. Note that many white colonies appear within the inhibition zone of fusidic acid (FD), a typical sign of resistance development which has also been reported for *S. aureus* [21].

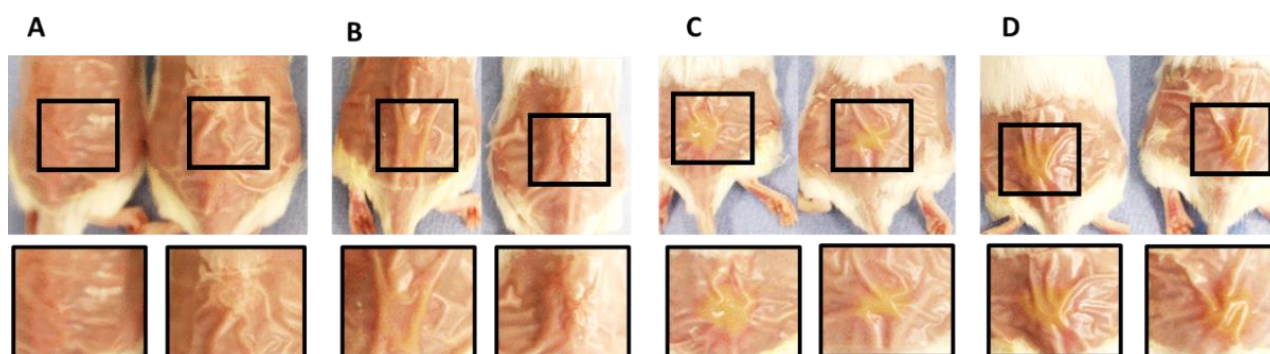

**Supplemental Figure 2**

Mouse wounds 24 h post infection with different inoculum size of LMGT 4219

A - 0 CFU; B -  $10^6$  CFU; C -  $10^7$  CFU; D -  $10^8$  CFU. Infected sites are magnified in the lower panel.

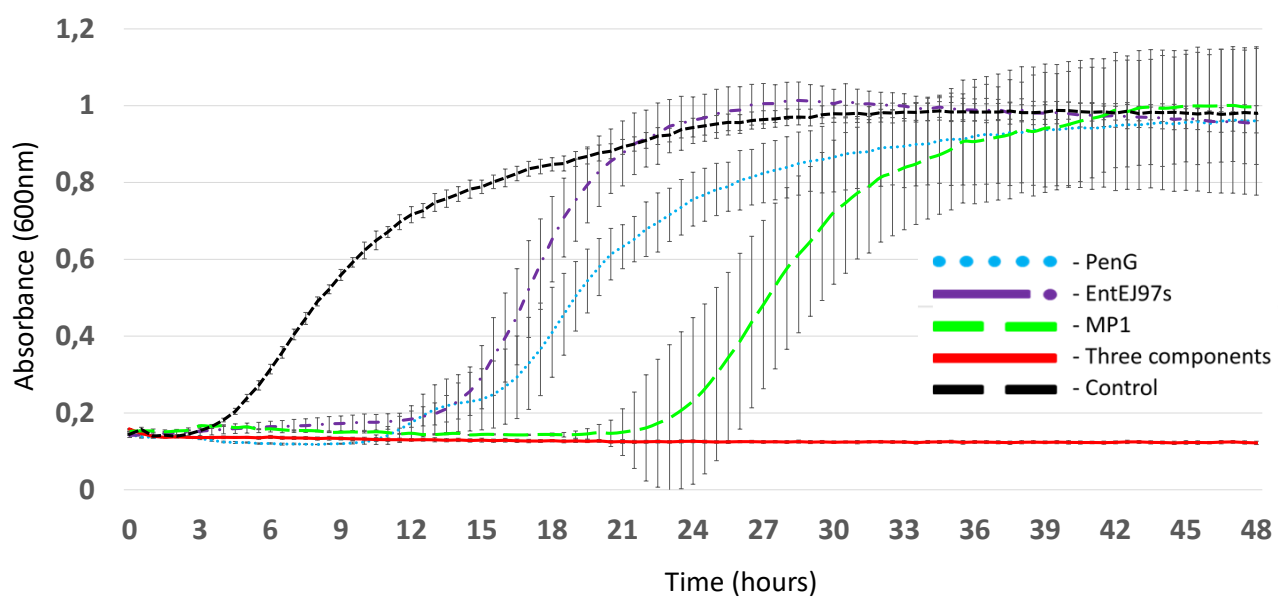

### Supplemental Figure 3

Growth curves of LMGT 4219 in the presence of different antimicrobials: PenG (250  $\mu\text{g/ml}$ ), EntEJ97s (50  $\mu\text{g/ml}$ ), MP1 (10  $\mu\text{g/ml}$ ), and the combination of all three antimicrobials.
